# Supplementary material for: The long-range π-conjugation between electron-rich species and multiwall carbon nanotubes influences the fluorescence lifetime and electromagnetic shielding
Source: Royal Society of Chemistry journal article supplement (doi:10.1039/d0na00444h), 2020-01-01
Supplement: d0na00444h1.pdf [file d0na00444h1.pdf]

**Supporting Information**

**The long-range  $\pi$ -conjugation between electron-rich species and multiwall carbon nanotubes influences fluorescence lifetime and electromagnetic shielding**

Sourav Biswas <sup>a</sup>, Sujit S. Panja <sup>a\*</sup>, Suryasarathi Bose <sup>b\*</sup>

<sup>a</sup>Department of Chemistry, National Institute of Technology, Durgapur 713209, India.

<sup>b</sup>Department of Materials Engineering, Indian Institute of Science, Bangalore 560012, India.

**Table of content**

| <b>Contents</b>                                                                                  | <b>Figure /Table No.</b> |
|--------------------------------------------------------------------------------------------------|--------------------------|
| 1. FT-IR of different molecules .....                                                            | S1                       |
| 2. FT-IR of different PC/PVDF blends containing .....                                            | S2                       |
| 3. Shielding of absorption of various blends .....                                               | S3                       |
| 4. Dielectric loss of various blends .....                                                       | S4                       |
| 5. Table for power law fitting exponents .....                                                   | S1                       |
| 6. Table for total shielding efficiency of various blends with fluorescence lifetime value ..... | S2                       |

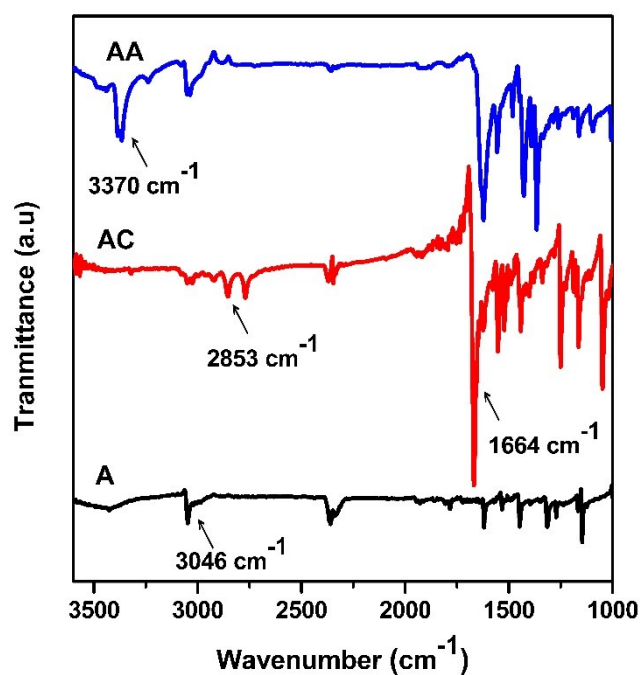

Figure S1: FT-IR of different molecules

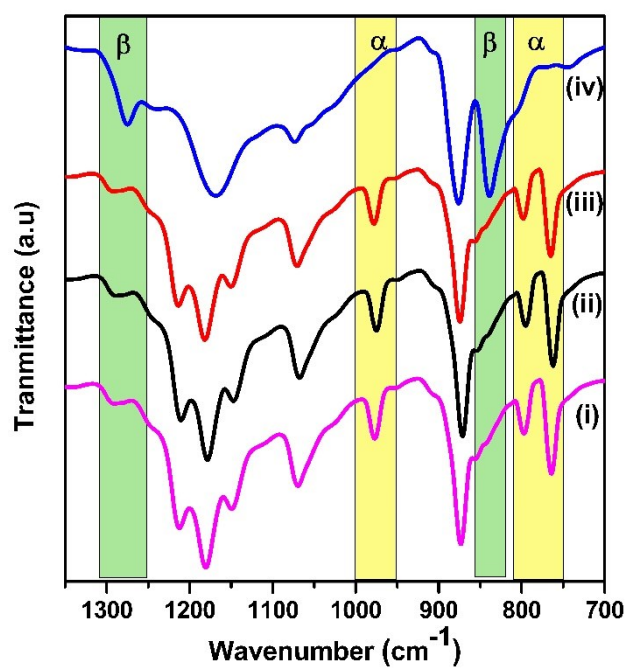

Figure S2: FT-IR of different PC/PVDF blends containing (i) MWCNT, (ii) A + MWCNT, (iii) AC + MWCNT and (iv) AA + MWCNT

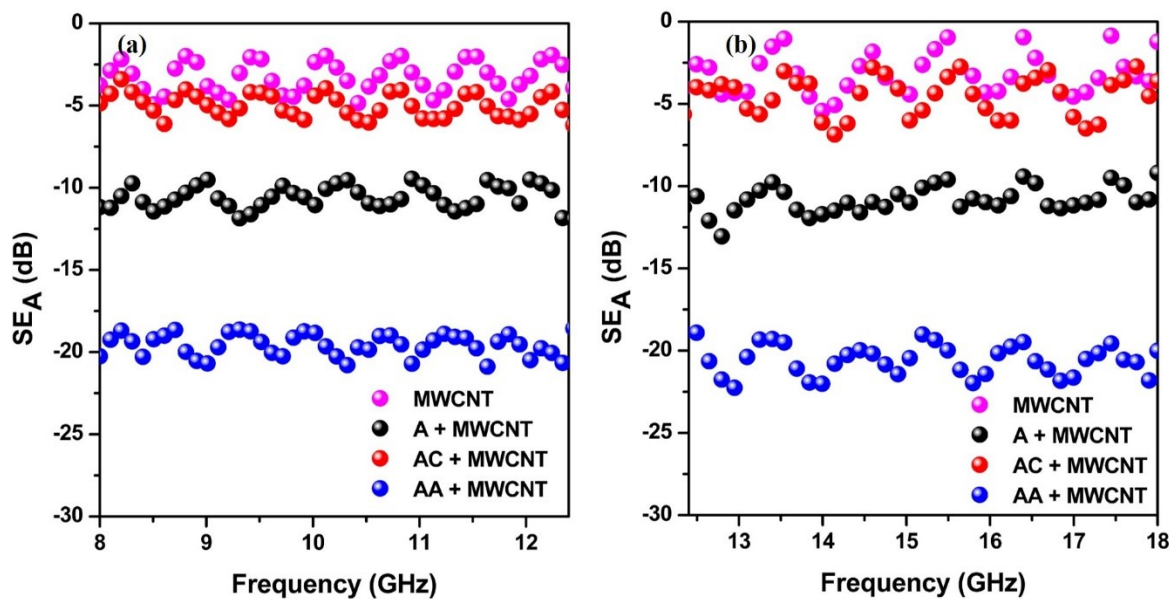

Figure S3: Shielding of absorption of various blends (a) 8- 12.4 GHz and (b) 12.4-18 GHz frequency

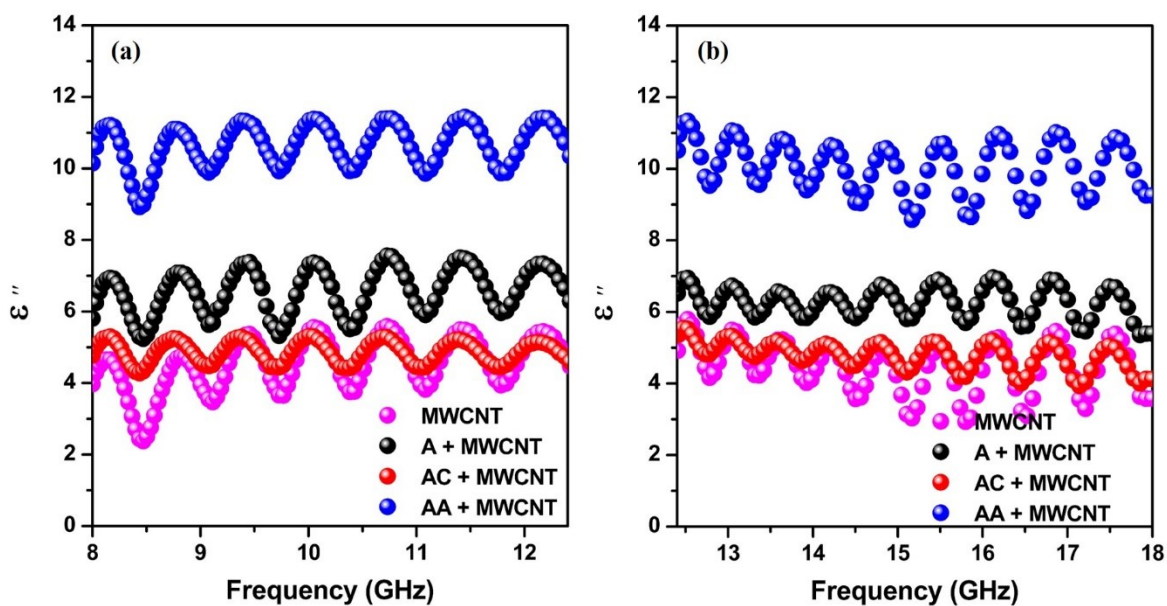

Figure S4: Dielectric loss of various blends (a) 8- 12.4 GHz and (b) 12.4-18 GHz frequency

**Table S1: Table for power law fitting exponents**

| <b>Fillers</b>    | $\sigma_{DC}$ | <b>A</b> | <b>N</b> |
|-------------------|---------------|----------|----------|
| <b>MWCNT</b>      | 3.12E-6       | 3.86E-14 | 0.82     |
| <b>A + MWCNT</b>  | 2.08E-5       | 6.36E-9  | 0.72     |
| <b>AC + MWCNT</b> | 5.75E-6       | 8.59E-6  | 0.80     |
| <b>AA + MWCNT</b> | 9.9E-4        | 2.51E-13 | 0.56     |

**Table S2: Table for total shielding efficiency of various blends with fluorescence lifetime value**

| <b>Fillers</b>    | <b>SE<sub>T</sub></b><br><b>(dB)</b> | <b>SE<sub>A</sub></b><br><b>(%)</b> | <b><math>\tau</math></b><br><b>(ns)</b> |
|-------------------|--------------------------------------|-------------------------------------|-----------------------------------------|
| <b>MWCNT</b>      | 7                                    | 52                                  | -                                       |
| <b>A + MWCNT</b>  | 15                                   | 71                                  | 4.15                                    |
| <b>AC + MWCNT</b> | 10                                   | 58                                  | 0.193                                   |
| <b>AA + MWCNT</b> | 25                                   | 87                                  | 8.48                                    |
